# Supplementary material for: What is the level of evidence for the amnestic effects of sedatives in pediatric patients? A systematic review and meta-analyses
Source: PLOS journal article supplement (doi:10.1371/journal.pone.0180248), 2017-07-07
Supplement: S1 (10.1371/journal.pone.0180248.s001) [file journal.pone.0180248.s001]

## PROSPERO International prospective register of systematic reviews

### Review title and timescale

- 1 **Review title**  
Give the working title of the review. This must be in English. Ideally it should state succinctly the interventions or exposures being reviewed and the associated health or social problem being addressed in the review.  
**Amnestic effects of sedatives in children and adolescents undergoing procedural sedation**
- 2 **Original language title**  
For reviews in languages other than English, this field should be used to enter the title in the language of the review. This will be displayed together with the English language title.
- 3 **Anticipated or actual start date**  
Give the date when the systematic review commenced, or is expected to commence.  
**01/04/2015**
- 4 **Anticipated completion date**  
Give the date by which the review is expected to be completed.  
**31/03/2016**
- 5 **Stage of review at time of this submission**  
Indicate the stage of progress of the review by ticking the relevant boxes. Reviews that have progressed beyond the point of completing data extraction at the time of initial registration are not eligible for inclusion in PROSPERO. This field should be updated when any amendments are made to a published record.  
  
The review has not yet started      ✓  
  

| Review stage                                                    | Started | Completed |
|-----------------------------------------------------------------|---------|-----------|
| Preliminary searches                                            | Yes     | Yes       |
| Piloting of the study selection process                         | Yes     | Yes       |
| Formal screening of search results against eligibility criteria | Yes     | Yes       |
| Data extraction                                                 | Yes     | Yes       |
| Risk of bias (quality) assessment                               | Yes     | Yes       |
| Data analysis                                                   | Yes     | Yes       |

  
Provide any other relevant information about the stage of the review here.  
**Submission on manuscript.**

### Review team details

- 6 **Named contact**  
The named contact acts as the guarantor for the accuracy of the information presented in the register record.  
**Professor Costa**
- 7 **Named contact email**  
Enter the electronic mail address of the named contact.  
**lsucasas@ufg.br**
- 8 **Named contact address**  
Enter the full postal address for the named contact.  
**Faculdade de Odontologia, Primeira Avenida, sem numero, Setor Universitario Goiania-GO, Brasil CEP 74605-220**
- 9 **Named contact phone number**  
Enter the telephone number for the named contact, including international dialing code.  
**+55 62 3209-6065**
- 10 **Organisational affiliation of the review**  
Full title of the organisational affiliations for this review, and website address if available. This field may be completed as 'None' if the review is not affiliated to any organisation.

Universidade Federal de Goiás - UFG

Website address:

11 Review team members and their organisational affiliations

Give the title, first name and last name of all members of the team working directly on the review. Give the organisational affiliations of each member of the review team.

| Title     | First name | Last name | Affiliation                                   |
|-----------|------------|-----------|-----------------------------------------------|
| Professor | Luciane    | Costa     | Universidade Federal de Goiás - UFG           |
| Dr        | Karolline  | Viana     | Universidade Federal de Goiás - UFG           |
| Dr        | Anelise    | Daher     | Universidade Federal de Goiás - UFG           |
| Professor | Lucianne   | Maia      | Universidade Federal do Rio de Janeiro - UFRJ |
| Professor | Paulo      | Costa     | Universidade Federal de Goiás - UFG           |
| Professor | Carolina   | Martins   | Universidade Federal de Minas Gerais - UFMG   |
| Professor | Saul       | Paiva     | Universidade Federal de Minas Gerais - UFMG   |

12 Funding sources/sponsors

Give details of the individuals, organizations, groups or other legal entities who take responsibility for initiating, managing, sponsoring and/or financing the review. Any unique identification numbers assigned to the review by the individuals or bodies listed should be included.

Fundação de Amparo à Pesquisa do Estado de Goiás (FAPEG) Coordenação de Aperfeiçoamento de Pessoal de Nível Superior (CAPES) Conselho Nacional de Desenvolvimento Científico e Tecnológico (CNPq)

13 Conflicts of interest

List any conditions that could lead to actual or perceived undue influence on judgements concerning the main topic investigated in the review.

Are there any actual or potential conflicts of interest?

None known

14 Collaborators

Give the name, affiliation and role of any individuals or organisations who are working on the review but who are not listed as review team members.

| Title | First name | Last name | Organisation details |
|-------|------------|-----------|----------------------|
|-------|------------|-----------|----------------------|

## Review methods

15 Review question(s)

State the question(s) to be addressed / review objectives. Please complete a separate box for each question.

What is the effect of different sedatives on memory of intraoperative events in children and adolescents undergoing procedural sedation?

16 Searches

Give details of the sources to be searched, and any restrictions (e.g. language or publication period). The full search strategy is not required, but may be supplied as a link or attachment.

Two reviewers will independently perform the search process under the guidance of a librarian. The following electronic databases will be searched: PubMed, Scopus, The Cochrane Library, Web of Science, LILACS. MeSh terms, key words and other free terms related to memory and sedation will be used with Boolean operators (OR, AND) to combine searches. There will be no language restrictions. Reference lists of all included studies will be hand searched in order to locate additional studies. Articles appearing in more than one database search will be considered only once.

17 URL to search strategy

If you have one, give the link to your search strategy here. Alternatively you can e-mail this to PROSPERO and we will store and link to it.

I give permission for this file to be made publicly available

Yes

- 18 **Condition or domain being studied**  
Give a short description of the disease, condition or healthcare domain being studied. This could include health and wellbeing outcomes.  
**This question is important because many persons remain conscious during a procedural sedation and, sometimes, they can show uncooperative behaviour and/or anxiety although sedated. So, if a sedated child keeps crying and/or moving during the procedure, will s/he remember the interventions performed? Will s/he recall any aversive stimuli received during the procedure and then be traumatized by it? If a sedated person does not remember any intraoperative event, this is good news for patients/parents and clinicians, because it confirms the benefit of amnesia associated with procedural conscious sedation, although there is a chance that the sedative does not keep patients quiet or calm. The relevance of this question is that if we have evidence for amnesia related to paediatric conscious sedation, we are assured that if children and adolescents show distress reactions during procedural sedation, they will not register it as a negative experience, and probably will have less chance of a future psychological trauma.**
- 19 **Participants/population**  
Give summary criteria for the participants or populations being studied by the review. The preferred format includes details of both inclusion and exclusion criteria.  
**Children and adolescents: - aged 2 to 19 years old - without cognitive or impairment - receiving sedatives as premedication or as agents for conscious procedural sedation in a medical or dental setting**
- 20 **Intervention(s), exposure(s)**  
Give full and clear descriptions of the nature of the interventions or the exposures to be reviewed  
**Any sedative regimen administered by a health professional in an outpatient setting, dental office or operating room**
- 21 **Comparator(s)/control**  
Where relevant, give details of the alternatives against which the main subject/topic of the review will be compared (e.g. another intervention or a non-exposed control group).  
**Placebo Variations of the same sedative regimen (dosage, route and timing of administration) Alternative sedation regimen**
- 22 **Types of study to be included**  
Give details of the study designs to be included in the review. If there are no restrictions on the types of study design eligible for inclusion, this should be stated.  
**Randomized clinical trials**
- 23 **Context**  
Give summary details of the setting and other relevant characteristics which help define the inclusion or exclusion criteria.
- 24 **Primary outcome(s)**  
Give the most important outcomes.  
**Anteretrograde amnesia, defined as loss of memory of the procedure assessed through recall and recognition tests performed after sedative administration**  
  
Give information on timing and effect measures, as appropriate.
- 25 **Secondary outcomes**  
List any additional outcomes that will be addressed. If there are no secondary outcomes enter None.  
**Retrograde amnesia**  
  
Give information on timing and effect measures, as appropriate.
- 26 **Data extraction (selection and coding)**  
Give the procedure for selecting studies for the review and extracting data, including the number of researchers involved and how discrepancies will be resolved. List the data to be extracted.
- 27 **Risk of bias (quality) assessment**  
State whether and how risk of bias will be assessed, how the quality of individual studies will be assessed, and

whether and how this will influence the planned synthesis.

Five possible sources of bias in the conduct and reporting of controlled trials are selection bias, performance bias, detection bias, attrition bias and reporting bias. We will attempt to keep the effect of these biases to a minimum by having at least two persons extracting data independently. They will use the 'Risk of bias' tool (Cochrane).

## 28 Strategy for data synthesis

Give the planned general approach to be used, for example whether the data to be used will be aggregate or at the level of individual participants, and whether a quantitative or narrative (descriptive) synthesis is planned. Where appropriate a brief outline of analytic approach should be given.

The appropriateness of running a meta-analysis will be checked. Data synthesis will be summarized in tables stratified by children's age range.

## 29 Analysis of subgroups or subsets

Give any planned exploration of subgroups or subsets within the review. 'None planned' is a valid response if no subgroup analyses are planned.

If there are sufficient data, we plan to conduct subgroup analysis for age, considering the different cognitive abilities among age ranges (Piaget): 2 to under 7 years old, 7 to under 12 years old, 12 to 19 years old.

## Review general information

## 30 Type and method of review

Select the type of review and the review method from the drop down list.

Intervention, Systematic review

## 31 Language

Select the language(s) in which the review is being written and will be made available, from the drop down list. Use the control key to select more than one language.

English

Will a summary/abstract be made available in English?

Yes

## 32 Country

Select the country in which the review is being carried out from the drop down list. For multi-national collaborations select all the countries involved. Use the control key to select more than one country.

Brazil

## 33 Other registration details

Give the name of any organisation where the systematic review title or protocol is registered together with any unique identification number assigned. If extracted data will be stored and made available through a repository such as the Systematic Review Data Repository (SRDR), details and a link should be included here.

## 34 Reference and/or URL for published protocol

Give the citation for the published protocol, if there is one.

Viana KA, Daher A, Maia LC, Costa PS, Martins CC, Paiva SM, Costa LR. Memory effects of sedative drugs in children and adolescents--protocol for a systematic review. Syst Rev. 2016 Feb 18;5:34. doi: 10.1186/s13643-016-0192-x.

Give the link to the published protocol, if there is one. This may be to an external site or to a protocol deposited with CRD in pdf format.

<https://systematicreviewsjournal.biomedcentral.com/articles/10.1186/s13643-016-0192-x>

I give permission for this file to be made publicly available

Yes

## 35 Dissemination plans

Give brief details of plans for communicating essential messages from the review to the appropriate audiences. Do you intend to publish the review on completion?

Yes

- 36 Keywords  
Give words or phrases that best describe the review. (One word per box, create a new box for each term)
- 37 Details of any existing review of the same topic by the same authors  
Give details of earlier versions of the systematic review if an update of an existing review is being registered, including full bibliographic reference if possible.
- 38 Current review status  
Review status should be updated when the review is completed and when it is published.  
**Completed but not published**

**31/07/2017**

- 39 Any additional information  
Provide any further information the review team consider relevant to the registration of the review.
- 40 Details of final report/publication(s)  
This field should be left empty until details of the completed review are available.  
Give the full citation for the final report or publication of the systematic review.  
Give the URL where available.
